# Supplementary material
Source: Springer Nature journal article supplement (https://www.springermedizin.de/resource/supplementary/13075_2012_3795_MOESM4_ESM.pdf/9695368)

**IL-29**

**CD68**

**DAPI**

**Merge**

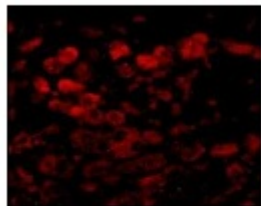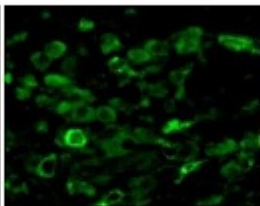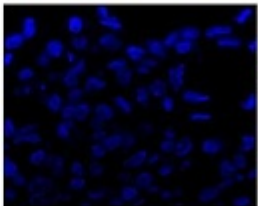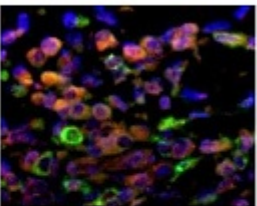

**IL-29**

**FGF-2**

**DAPI**

**Merge**

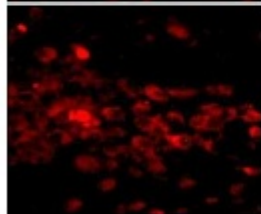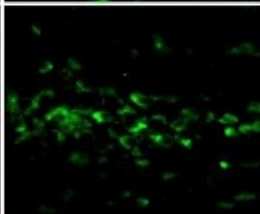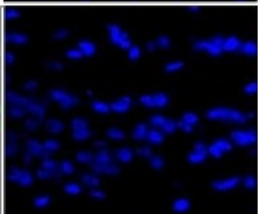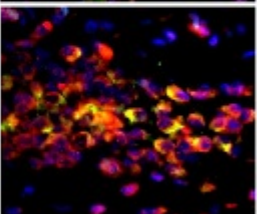

Supplement: MOESM4 [file 9695368]
